# Supplementary material
Source: PubMed Central journal article supplement (PMC3581893)
Supplement: 1217470110_pnas.201217470SI.pdf [file 1217470110_pnas.201217470SI.pdf]

# Supporting Information

Ryder et al. 10.1073/pnas.1217470110

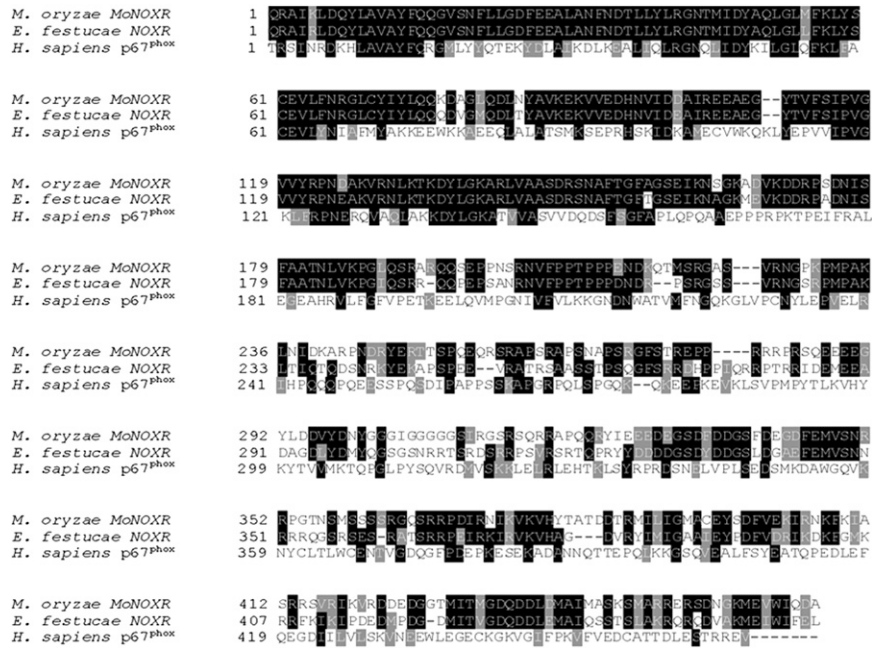

**Fig. S1.** Amino acid sequence alignment of *M. oryzae* NADPH oxidase isoform R protein. The amino acid sequence of NoxR was aligned with human p67<sup>Phox</sup> and *E. festucae* NoxR. Sequences were aligned using ClustalW and shaded using GeneDoc version 2.6.02. Amino acid residues within a black background were identical among all listed proteins, dark gray residues were identical in two out of three of the listed proteins, and those shown on a white background do not show any similarity.





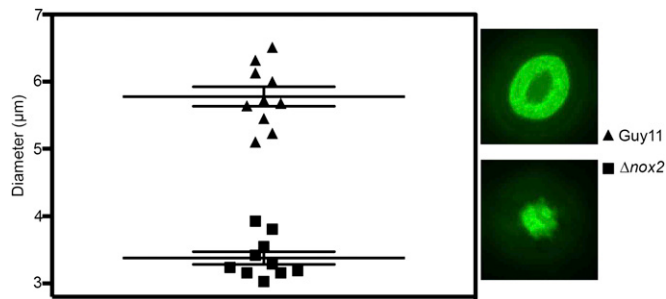

**Fig. S5.** Graph to show the range of Sep5-GFP ring sizes observed in wild-type and  $\Delta nox2$  mutants of *M. oryzae* during appressorium development. Live-cell imaging experiments were carried out by expression of *SEP5-GFP* in Guy11 or  $\Delta nox2$  mutant. Triangles represent the diameter values of septin rings observed in Guy11. The black squares represent the diameter values of aberrant septin accumulations observed in the  $\Delta nox2$  mutant. Long horizontal lines represent the mean diameter and short horizontal lines are the SEM. The y axis shows diameter in micrometers.

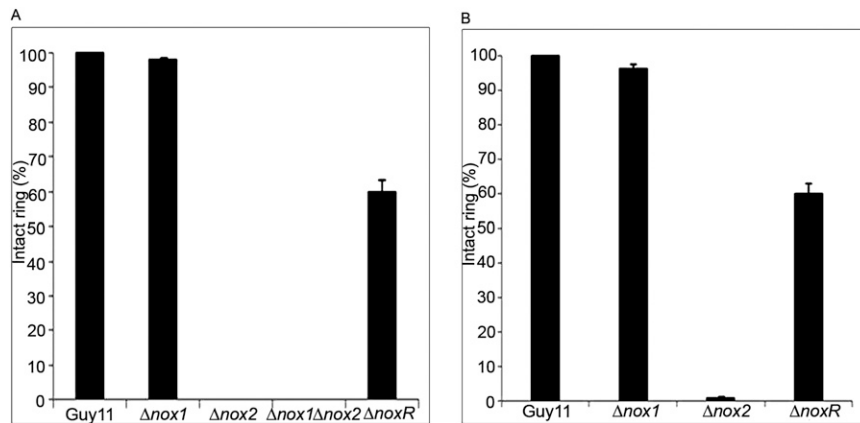

**Fig. S6.** Live-cell imaging of Sep5-GFP and Chm1-GFP in  $\Delta nox2$  and  $\Delta noxR$  mutants. (A) Bar chart showing the percentage of appressoria with intact Sep5-GFP rings after 24 h. Values are mean  $\pm$  2 SE for three repetitions of the experiment,  $n = 100$ . (B) Bar chart to show the percentage of appressoria containing intact Chm1-GFP rings after 24 h. Values are mean  $\pm$  2 SE for three repetitions of the experiment,  $n = 100$ .

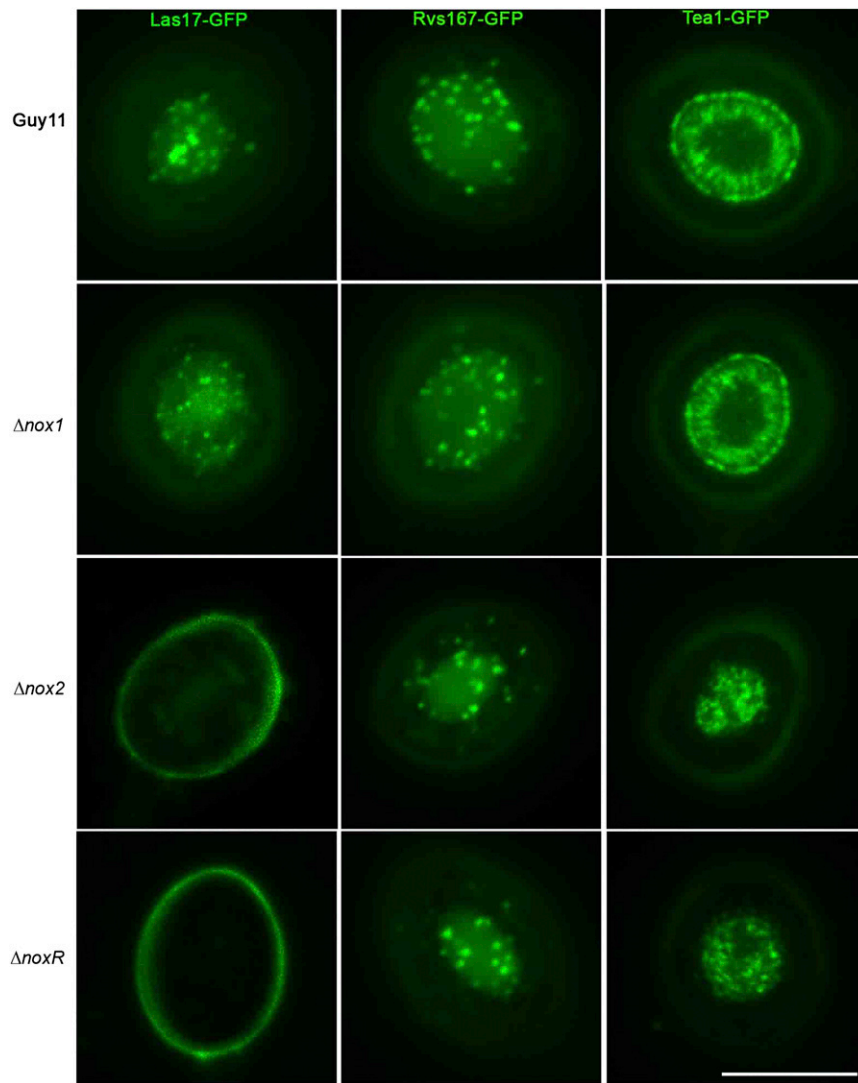

**Fig. S7.** Expression and localization of Las17-GFP, Tea1-GFP, and Rvs167-GFP in  $\Delta nox2$  and  $\Delta noxR$  mutants of *M. oryzae*.  $\Delta nox1$ ,  $\Delta nox2$ , and  $\Delta noxR$  mutants were independently transformed with *LAS17-GFP*, *TEA1-GFP*, and *RVS167-GFP* gene fusions, inoculated onto glass coverslips, and observed by epifluorescence microscopy. In  $\Delta nox1$  mutants, *Las17-GFP*, *Tea1-GFP*, and *Rvs167-GFP* localized in the same pattern as Guy11. In  $\Delta nox2$  and  $\Delta noxR$  mutants, *Las17-GFP*, *Tea1-GFP*, and *Rvs167-GFP* were mislocalized. Therefore, ERM-actin interactions at the appressorium pore, which are essential for linking cortical F-actin to the membrane to facilitate penetration peg emergence, require the Nox2/NoxR complex. (Scale bar, 10  $\mu\text{m}$ .)

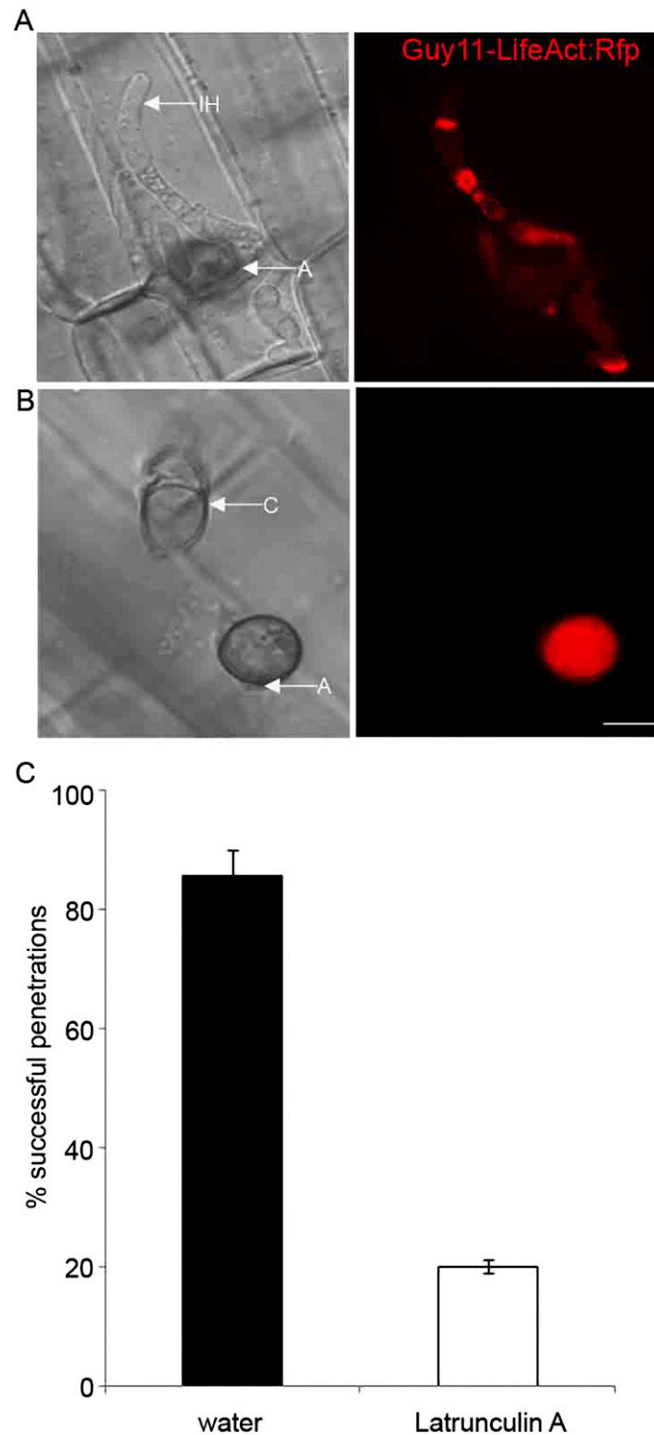

**Fig. 58.** Exposure to latrunculin A prevents appressorium-mediated rice infection by *M. oryzae*. Micrographs of LifeAct-RFP localization in the presence or absence of latrunculin A. A conidial suspension of the Guy11 expressing LifeAct:RFP at  $5 \times 10^4$  mL<sup>-1</sup> was inoculated onto the surface of rice leaf sheath and incubated in a moist chamber at 24 °C. (A) Deionized water or (B) 3  $\mu$ g/mL latrunculin A was added to the conidial suspension after 16 h. Representative images were recorded using an IX-81 Olympus inverted microscope. A, appressorium; C, conidium; IH, invasive hypha. (Scale bar, 10  $\mu$ m.) (C) Bar charts to show percentage of appressoria forming penetration pegs after 24 h ( $n = 100$ ). The percentage of appressoria forming penetration hyphae following latrunculin A treatment was significantly reduced ( $P < 0.001$ ) compared with water treatment. Values in C are means  $\pm 2$  SE for three repetitions of the experiment.



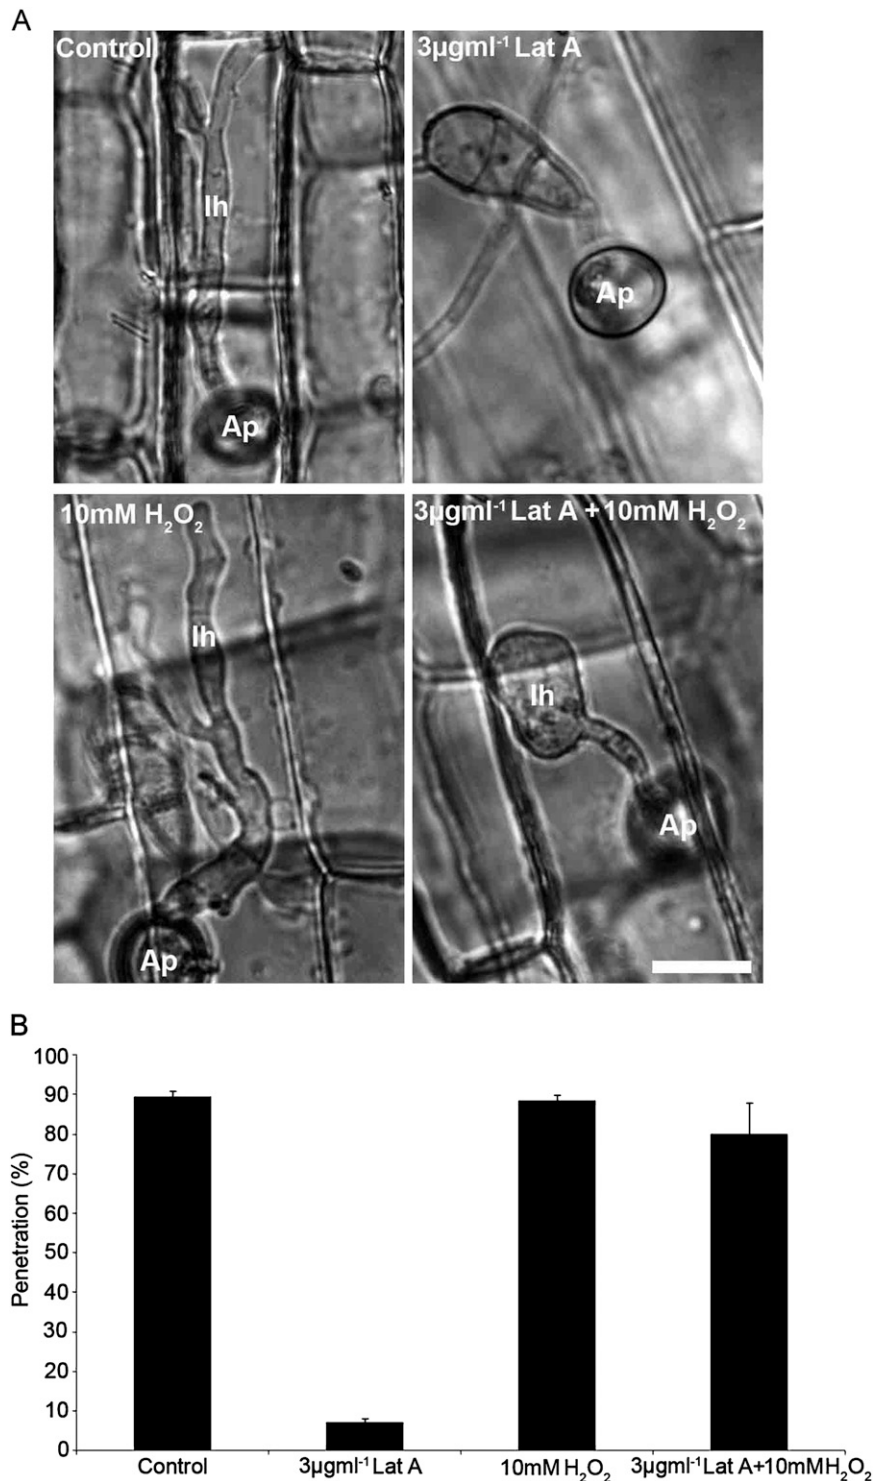

**Fig. S9.** Addition of  $\text{H}_2\text{O}_2$  partially remedies the effects of latrunculin A on appressorium-mediated plant infection by *M. oryzae*. A conidial suspension of wild-type Guy11 at  $5 \times 10^4 \text{ mL}^{-1}$  was inoculated onto the surface of rice leaf sheath and incubated in a moist chamber at  $24^\circ\text{C}$  to form appressoria. At 16 h, deionized water, 3  $\mu\text{g/mL}$  latrunculin A, 10 mM  $\text{H}_2\text{O}_2$ , or 3  $\mu\text{g/mL}$  latrunculin A and 10 mM  $\text{H}_2\text{O}_2$  was added to the developing appressoria. (A) Bright-field micrographs were recorded using an IX-81 Olympus inverted microscope. Ap, appressorium; Ih, invasive hypha. (Scale bar, 10  $\mu\text{m}$ .) (B) Bar charts to show percentage of appressoria forming penetration pegs after 24 h ( $n = 100$ ). A significant reduction in penetration peg formation was observed following latrunculin A treatment ( $P < 0.001$ ) but simultaneous addition of 10 mM  $\text{H}_2\text{O}_2$  restored the frequency of peg formation to almost wild-type levels. Pegs ruptured the leaf cuticle but did not develop into extensive invasion hyphae. Values are means  $\pm 2$  SE.

**Table S1. Primers used in this study**

| Primer name   | DNA sequence (5'-3')                                    |
|---------------|---------------------------------------------------------|
| NoxR50.1F     | GGACGCTACACCCAGCTCCAACAT                                |
| NoxR50.1R     | GTCGTGACTGGGAAAACCCCTGGCGGCTAAAATCAATCAACTCTCTTTT       |
| NoxR30.1F     | TTATTCCCTGCTGAGACTTTCATC                                |
| NoxR30.1R     | TCCTGTGTGAAATGTTATCCGCTTAAAGCGAGCGATGGTTTTGACTT         |
| Nox2-RFPF     | CTGTTACTTTTTTCTGTTACTGTTGTCGCTAATGATCTTGAGTTATTTGGCACT  |
| Nox2-RFPR     | TTTGATGACCTCCTCGCCCTTGCTCACCATGAAATTCTCCTTGCCCCATACGAA  |
| NoxRpromF     | CTGTTACTTTTTTCTGTTACTGTTGTCGCTCTGGCTCAGCGCCACGAAAA      |
| NoxRpromR     | GCTAAAATCAATCAACTCTCTTTT                                |
| GFPF          | CTAACCAAAGAGAGTTGATTGATTTTAGCATGGTGAGCAAGGGCGAGGAGCTG   |
| GFPR          | CTGTACAGCTCGTCCATGCCGTG                                 |
| NoxRORFF      | CACGGCATGGACGAGCTGTACAAGTCGCTCAAGCAGGTACGTTTCGTTATTCGTA |
| NoxRORFR      | TTCACACAGGAAACAGCTATGACCATGATGGATGGATATGTTATTTTCGGTAG   |
| Gelsolin-GFPF | CTGTTACTTTTTTCTGTTACTGTTGTCGCTACGTTATTCAACACAAACCCACCC  |
| Gelsolin-GFPR | GGTGAACAGCTCCTCGCCCTTGCTCACCATATGGGCTTGAAGCGCCCTCATGAA  |

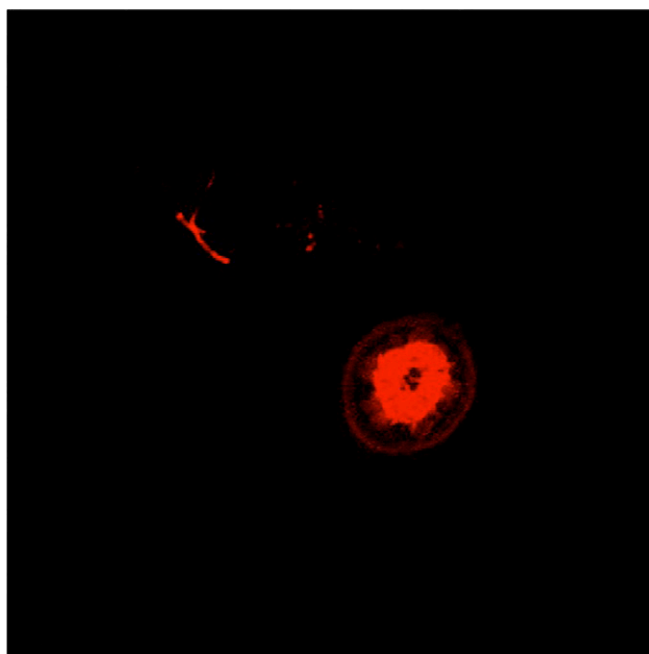

**Movie S1.** Three-dimensional rotational movie to show toroidal F-actin network at the appressorium pore in the wild-type *M. oryzae* strain Guy11.

[Movie S1](#)



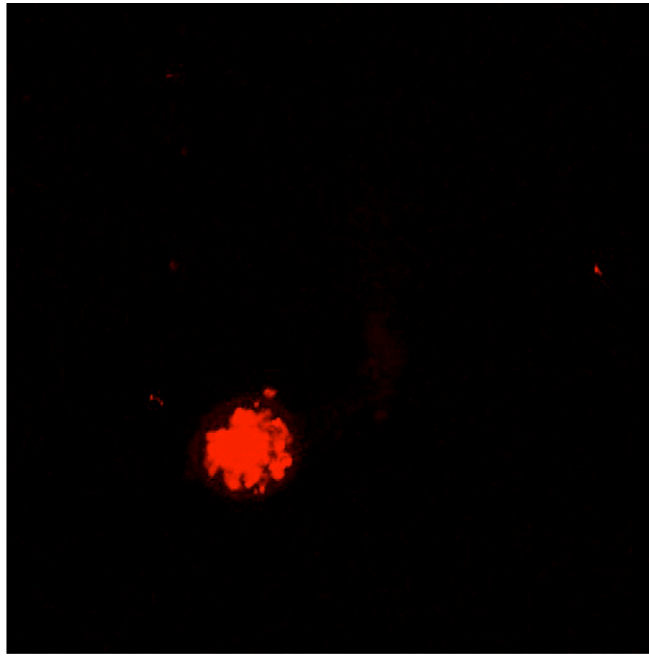

**Movie S2.** Three-dimensional rotational movie to show misshapen F-actin network at the appressorium pore of the *M. oryzae*  $\Delta$ nox1 mutant.

[Movie S2](#)

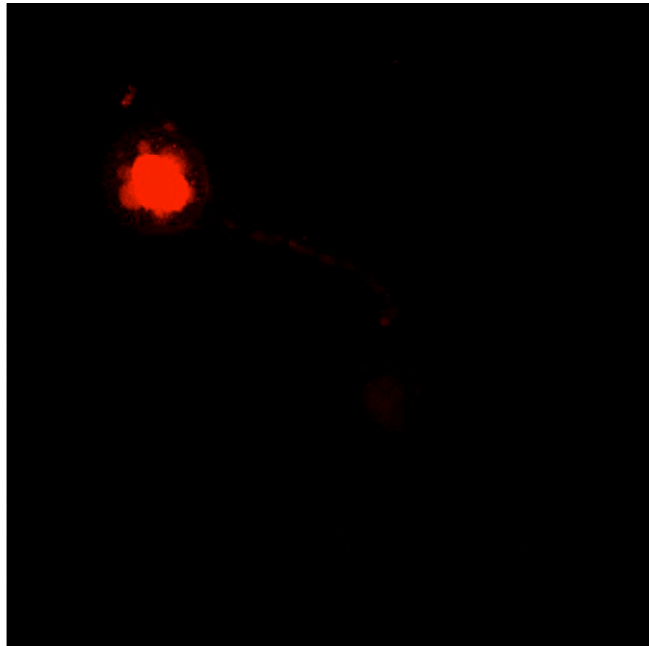

**Movie S3.** Three-dimensional rotational movie to show distorted F-actin network in the appressorium of the *M. oryzae*  $\Delta$ nox2 mutant.

[Movie S3](#)

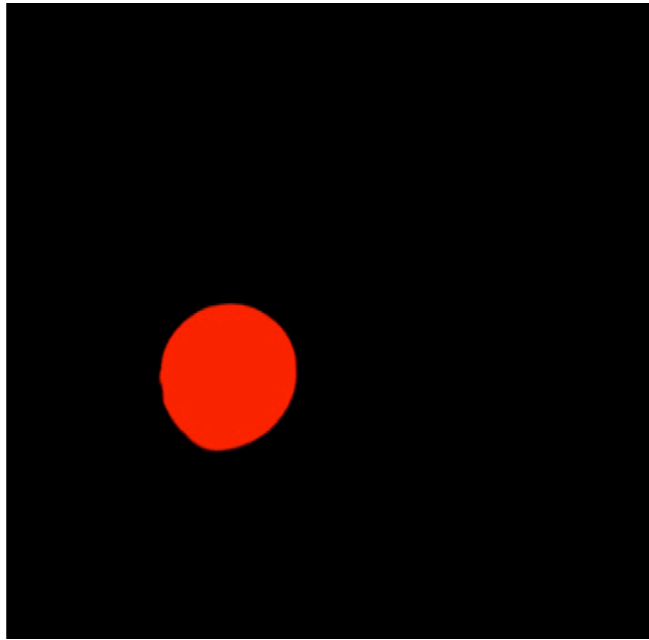

**Movie S4.** Three-dimensional rotational movie to show distorted F-actin network in the appressorium of the *M. oryzae*  $\Delta nox1\Delta nox2$  mutant.

[Movie S4](#)

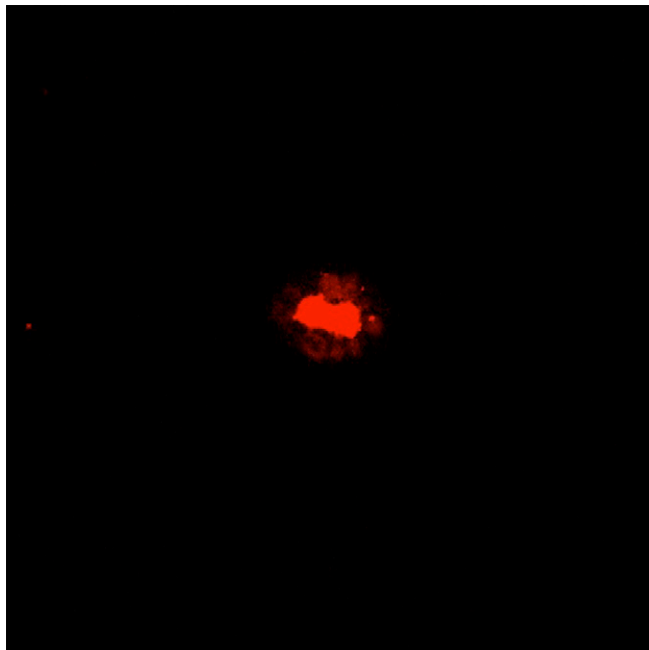

**Movie S5.** Three-dimensional rotational movie to show distorted F-actin network at the center of the appressorium of the *M. oryzae*  $\Delta noxR$  mutant.

[Movie S5](#)

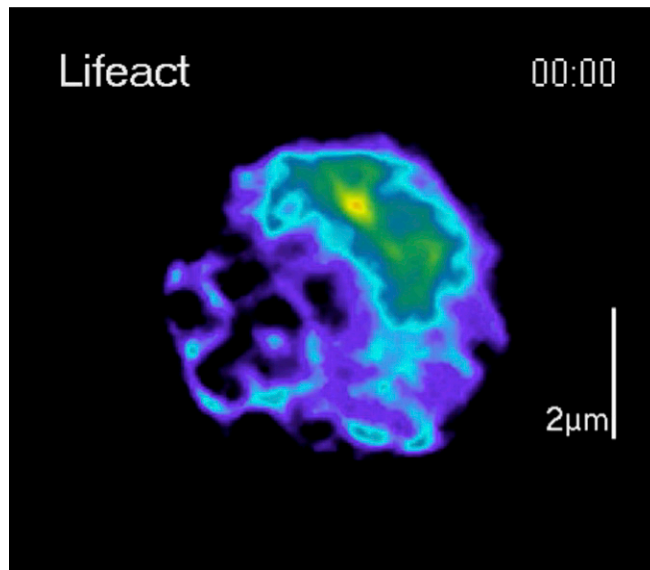

**Movie S6.** Live-cell imaging to show recovery of LifeAct-RFP after partial photobleaching.

[Movie S6](#)

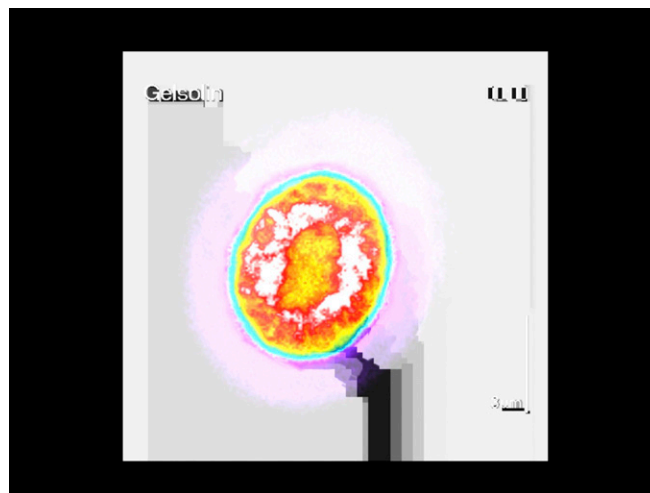

**Movie S7.** Live-cell imaging to show recovery of Gelsolin-GFP after partial photobleaching.

[Movie S7](#)
